# Supplementary material
Source: HighWire-hosted journal article supplement (https://thorax.bmj.com/content/79/3/202)
Supplement: inline-supplementary-material-1 [file inline-supplementary-material-1.pdf]

**Cause specific mortality in COPD sub-populations: a cohort study of 339,647 people in England**

## Supplementary material

## Contents

|                                                                                                                                                                         |   |
|-------------------------------------------------------------------------------------------------------------------------------------------------------------------------|---|
| Additional methodology .....                                                                                                                                            | 2 |
| Table S1: Baseline characteristics by exacerbation frequency .....                                                                                                      | 3 |
| Table S2: Baseline characteristics by exacerbation severity.....                                                                                                        | 4 |
| Table S3: Baseline characteristics by chronic bronchitis and emphysema.....                                                                                             | 5 |
| Table S4: Baseline characteristics by GOLD stage.....                                                                                                                   | 6 |
| Table S5: Baseline characteristics by airflow limitation (FEV1 % predicted) .....                                                                                       | 7 |
| Table S6: Odds of all-cause, COPD, and CVD related mortality by baseline exposure groups. ....                                                                          | 8 |
| Figure E1: Proportion of patients dying from all-cause, COPD-related, and CVD-related causes within 30 days of an exacerbation of COPD by baseline FEV1 predicted. .... | 9 |

## Additional methodology

Currently, CPRD Aurum contains information on over 900 general practices including over 20 million individuals registered to these practices (both currently and historically) and is generalisable in terms of age and sex [1].

Specific cause of death was determined from death certificates through ONS mortality data using ICD10 codes that related to the patient's underlying cause of death. Every death in the UK must be reported by the General Register Office and information is recorded by the ONS. A medical certificate is required upon death which lists the underlying cause of death and up to 15 contributory causes of death. ONS derives underlying cause of death using standardised guidelines from information available on death certificates and coded using the International Statistical Classification of Diseases and Related Health Problems 10th Revision (ICD-10) [2].

Table S1: Baseline characteristics by exacerbation frequency

|                       | <b>None</b>               | <b>1</b>                  | <b>2+</b>                 |
|-----------------------|---------------------------|---------------------------|---------------------------|
| <b>Characteristic</b> | <b>n (%) or mean (SD)</b> | <b>n (%) or mean (SD)</b> | <b>n (%) or mean (SD)</b> |
| <b>Age</b>            |                           |                           |                           |
| Mean (SD)             | 67.2 (11.7)               | 68.0 (11.6)               | 68.8 (11.8)               |
| <50                   | 20,200 (8.8)              | 5,088 (7.3)               | 2,684 (6.8)               |
| 50-59                 | 41,845 (18.2)             | 12,355 (17.7)             | 6,623 (16.7)              |
| 60-69                 | 70,082 (30.4)             | 20,732 (29.7)             | 11,452 (28.8)             |
| 70-79                 | 64,764 (28.1)             | 20,185 (29.0)             | 11,612 (29.2)             |
| 80+                   | 33,300 (14.5)             | 11,335 (16.3)             | 7,390 (18.6)              |
| <b>Gender</b>         |                           |                           |                           |
| Men                   | 126,472 (54.9)            | 35,050 (50.3)             | 18,714 (47.1)             |
| Women                 | 103,719 (45.1)            | 34,645 (49.7)             | 21,047 (52.9)             |
| <b>Smoking status</b> |                           |                           |                           |
| Ex-smoker             | 121,194 (52.7)            | 36,245 (52.0)             | 21,690 (54.6)             |
| Current smoker        | 108,997 (47.4)            | 33,450 (48.0)             | 18,071 (45.4)             |
| <b>MI</b>             | 15,966 (6.9)              | 5,590 (8.0)               | 3,650 (9.2)               |
| <b>HF</b>             | 14,175 (6.2)              | 5,503 (7.9)               | 4,075 (10.3)              |
| <b>Stroke</b>         | 55,394 (24.1)             | 17,843 (25.6)             | 10,738 (27.0)             |
| <b>Depression</b>     | 58,089 (25.2)             | 20,155 (28.9)             | 12,749 (32.1)             |
| <b>Anxiety</b>        | 48,539 (21.1)             | 17,001 (24.4)             | 11,133 (28.0)             |
| <b>GORD</b>           | 34,584 (15.0)             | 12,026 (17.3)             | 7,835 (19.7)              |
| <b>Lung cancer</b>    | 2,096 (0.9)               | 849 (1.2)                 | 739 (1.9)                 |
| <b>BMI</b>            |                           |                           |                           |
| Underweight           | 7,930 (3.4)               | 2,809 (4.0)               | 1,834 (4.6)               |
| Normal                | 64,844 (28.2)             | 19,556 (28.1)             | 11,086 (27.9)             |
| Overweight            | 68,041 (29.6)             | 19,672 (28.2)             | 10,991 (27.6)             |
| Obese                 | 59,505 (25.9)             | 18,628 (26.7)             | 10,990 (27.6)             |
| Missing               | 29,871 (13.0)             | 9,030 (13.0)              | 4,860 (12.2)              |
| <b>Hypertension</b>   | 98,490 (42.8)             | 30,654 (44.0)             | 17,887 (45.0)             |
| <b>Diabetes</b>       | 33,747 (14.7)             | 11,551 (16.6)             | 7,306 (18.4)              |
| <b>Asthma</b>         | 80,241 (34.9)             | 24,607 (35.3)             | 16,198 (40.7)             |
| <b>GOLD</b>           |                           |                           |                           |
| Mild                  | 49,386 (21.5)             | 13,403 (19.2)             | 6,687 (16.8)              |
| Moderate              | 90,819 (39.5)             | 27,989 (40.2)             | 14,816 (37.3)             |
| Severe                | 29,369 (12.8)             | 10,502 (15.1)             | 6,685 (16.8)              |
| Very severe           | 4,889 (2.1)               | 1,894 (2.7)               | 1,599 (4.0)               |
| Missing               | 55,728 (24.2)             | 15,907 (22.8)             | 9,974 (25.1)              |

Legend: MI (myocardial infarction), HF (heart failure), GORD (gastro-oesophageal reflux disorder). SD (standard deviation). Numbers are proportions or means displayed as n (%) or mean (SD). Total population N=339,647.

Table S2: Baseline characteristics by exacerbation severity

|                       | None               | Moderate           | Severe             |
|-----------------------|--------------------|--------------------|--------------------|
| Characteristic        | n (%) or mean (SD) | n (%) or mean (SD) | n (%) or mean (SD) |
| <b>Age</b>            |                    |                    |                    |
| Mean (SD)             | 67.2 (11.7)        | 67.9 (11.6)        | 71.1 (11.7)        |
| <50                   | 20,200 (8.8)       | 7,030 (7.4)        | 742 (5.1)          |
| 50-59                 | 41,845 (18.2)      | 17,021 (17.9)      | 1,957 (13.4)       |
| 60-69                 | 70,082 (30.4)      | 28,520 (30.1)      | 3,664 (25.1)       |
| 70-79                 | 64,764 (28.1)      | 27,203 (28.7)      | 4,594 (31.5)       |
| 80+                   | 33,300 (14.5)      | 15,079 (15.9)      | 3,646 (25.0)       |
| <b>Gender</b>         |                    |                    |                    |
| Men                   | 126,472 (54.9)     | 46,194 (48.7)      | 7,570 (51.9)       |
| Women                 | 103,719 (45.1)     | 48,659 (51.3)      | 7,033 (48.2)       |
| <b>Smoking status</b> |                    |                    |                    |
| Ex-smoker             | 121,194 (52.7)     | 49,803 (52.5)      | 8,132 (55.7)       |
| Current smoker        | 108,997 (47.4)     | 45,050 (47.5)      | 6,471 (44.3)       |
| <b>MI</b>             | 15,966 (6.9)       | 7,568 (8.0)        | 1,672 (11.4)       |
| <b>HF</b>             | 14,175 (6.2)       | 7,587 (8.0)        | 1,991 (13.6)       |
| <b>Stroke</b>         | 55,394 (24.1)      | 24,688 (26.0)      | 3,893 (26.7)       |
| <b>Depression</b>     | 58,089 (25.2)      | 28,932 (30.5)      | 3,972 (27.2)       |
| <b>Anxiety</b>        | 48,539 (21.1)      | 24,857 (26.2)      | 3,280 (22.5)       |
| <b>GORD</b>           | 34,584 (15.0)      | 17,738 (18.7)      | 2,123 (14.5)       |
| <b>Lung cancer</b>    | 2,096 (0.9)        | 1,291 (1.4)        | 296 (2.0)          |
| <b>BMI</b>            |                    |                    |                    |
| Underweight           | 7,930 (3.4)        | 3,685 (3.9)        | 958 (6.6)          |
| Normal                | 64,844 (28.2)      | 26,590 (29.0)      | 4,052 (27.8)       |
| Overweight            | 68,041 (29.6)      | 27,282 (28.8)      | 3,381 (23.1)       |
| Obese                 | 59,505 (25.9)      | 25,891 (27.3)      | 3,727 (25.5)       |
| Missing               | 29,871 (13.0)      | 11,405 (12.0)      | 2,485 (17.0)       |
| <b>Hypertension</b>   | 98,490 (42.8)      | 41,437 (43.7)      | 7,104 (48.7)       |
| <b>Diabetes</b>       | 33,747 (14.7)      | 15,818 (16.7)      | 3,039 (20.8)       |
| <b>Asthma</b>         | 80,241 (34.9)      | 35,936 (37.9)      | 4,869 (33.4)       |
| <b>GOLD</b>           |                    |                    |                    |
| Mild                  | 49,386 (21.5)      | 18,591 (19.6)      | 1,499 (10.3)       |
| Moderate              | 90,819 (39.5)      | 38,710 (40.8)      | 4,095 (28.0)       |
| Severe                | 29,369 (12.8)      | 14,576 (15.4)      | 2,611 (17.9)       |
| Very severe           | 4,889 (2.1)        | 2,662 (2.8)        | 831 (5.7)          |
| Missing               | 55,728 (24.2)      | 20,314 (31.4)      | 5,567 (38.1)       |

Legend: MI (myocardial infarction), HF (heart failure), GORD (gastro-oesophageal reflux disorder). SD (standard deviation). Numbers are proportions or means displayed as n (%) or mean (SD). Total population N=339,647.

Table S3: Baseline characteristics by chronic bronchitis and emphysema

| Characteristic        | Emphysema          | Chronic bronchitis |
|-----------------------|--------------------|--------------------|
|                       | n (%) or mean (SD) | n (%) or mean (SD) |
| <b>Age</b>            |                    |                    |
| Mean (SD)             | 68.6 (11.8)        | 70.9 (11.3)        |
| <50                   | 1,709 (7.6)        | 226 (4.9)          |
| 50-59                 | 3,602 (16.1)       | 557 (12.0)         |
| 60-69                 | 6,279 (28.0)       | 1,301 (28.0)       |
| 70-79                 | 6,754 (30.1)       | 1,498 (32.2)       |
| 80+                   | 4,069 (18.2)       | 1,063 (22.9)       |
| <b>Gender</b>         |                    |                    |
| Men                   | 13,319 (59.4)      | 2,441 (52.6)       |
| Women                 | 9,094 (40.6)       | 2,204 (47.4)       |
| <b>Smoking status</b> |                    |                    |
| Ex-smoker             | 13,055 (58.3)      | 2,543 (54.7)       |
| Current smoker        | 9,358 (41.8)       | 2,102 (45.3)       |
| <b>MI</b>             | 1,851 (8.3)        | 386 (8.3)          |
| <b>HF</b>             | 1,909(8.5)         | 428 (9.2)          |
| <b>Stroke</b>         | 5,567 (24.9)       | 1,217 (26.2)       |
| <b>Depression</b>     | 6,087 (27.2)       | 1,299 (28.0)       |
| <b>Anxiety</b>        | 5,242 (23.4)       | 1,1665(25.1)       |
| <b>GORD</b>           | 3,952 (17.6)       | 958 (20.6)         |
| <b>Lung cancer</b>    | 447 (2.0)          | 57 (1.2)           |
| <b>BMI</b>            |                    |                    |
| Underweight           | 1,715 (7.7)        | 195 (4.2)          |
| Normal                | 8,135 (36.3)       | 1,346 (29.0)       |
| Overweight            | 5,891 (26.3)       | 1,446 (31.2)       |
| Obese                 | 3,666 (16.4)       | 1,196 (25.7)       |
| Missing               | 3,006 (13.4)       | 462 (10.0)         |
| <b>Hypertension</b>   | 8,770 (39.1)       | 2,177 (46.9)       |
| <b>Diabetes</b>       | 2,992(13.4)        | 824 (17.8)         |
| <b>Asthma</b>         | 7,201 (32.1)       | 2,501 (53.9)       |
| <b>GOLD</b>           |                    |                    |
| Mild                  | 5,748 (25.6)       | 992 (21.4)         |
| Moderate              | 6,752 (30.1)       | 1,735 (37.3)       |
| Severe                | 3,302 (14.7)       | 773 (16.7)         |
| Very severe           | 1,094 (4.9)        | 197 (4.2)          |
| Missing               | 5,517 (24.6)       | 948 (20.4)         |
| <b>AECOPD any</b>     |                    |                    |
| None                  | 15,059 (67.2)      | 2,913 (62.7)       |
| Any                   | 7,354 (32.8)       | 1,731 (37.3)       |

Legend: MI (myocardial infarction), HF (heart failure), GORD (gastro-oesophageal reflux disorder). SD (standard deviation). Numbers are proportions or means displayed as n (%) or mean (SD). Total population N=27,058.

Table S4: Baseline characteristics by GOLD stage

|                       | <b>GOLD A</b>             | <b>GOLD B</b>             | <b>GOLD C</b>             | <b>GOLD D</b>             |
|-----------------------|---------------------------|---------------------------|---------------------------|---------------------------|
| <b>Characteristic</b> | <b>n (%) or mean (SD)</b> |
| <b>Age</b>            |                           |                           |                           |                           |
| Mean (SD)             | 65.3 (11.1)               | 68.6 (11.2)               | 66.7 (11.2)               | 69.6 (11.4)               |
| <50                   | 4,038 (10.1)              | 7,653 (6.2)               | 351 (8.1)                 | 1,310 (5.6)               |
| 50-59                 | 8,206 (20.5)              | 19,635 (15.9)             | 810 (18.7)                | 3,544 (15.1)              |
| 60-69                 | 13,578 (34.0)             | 37,633 (30.5)             | 1,481 (34.2)              | 6,639 (28.3)              |
| 70-79                 | 10,585 (26.5)             | 38,001 (30.8)             | 1,167 (26.9)              | 7,338 (31.3)              |
| 80+                   | 3,579 (9.0)               | 20,316 (16.5)             | 526 (12.1)                | 4,613 (19.7)              |
| <b>Gender</b>         |                           |                           |                           |                           |
| Men                   | 23,660 (59.2)             | 65,421 (53.1)             | 2,261 (52.2)              | 11,303 (48.2)             |
| Women                 | 16,326 (40.8)             | 57,817 (46.9)             | 2,074 (47.8)              | 12,141 (51.8)             |
| <b>Smoking status</b> |                           |                           |                           |                           |
| Ex-smoker             | 21,042 (52.6)             | 66,750 (54.2)             | 2,271 (52.4)              | 13,290 (56.7)             |
| Current smoker        | 18,945 (47.4)             | 56,508 (45.9)             | 2,064 (47.6)              | 10,168 (43.4)             |
| <b>MI</b>             | 2,091 (5.2)               | 9,612 (7.8)               | 322 (7.4)                 | 2,314 (9.9)               |
| <b>HF</b>             | 1,343 (3.4)               | 8,936 (7.3)               | 192 (4.4)                 | 2,666 (11.4)              |
| <b>Stroke</b>         | 9,050 (22.6)              | 30,599 (24.8)             | 1,039 (24.0)              | 6,313 (26.9)              |
| <b>Depression</b>     | 8,844 (22.1)              | 32,838 (26.6)             | 1,169 (27.0)              | 7,355 (31.4)              |
| <b>Anxiety</b>        | 7,867 (19.7)              | 27,108 (22.0)             | 1,050 (24.2)              | 6,286 (26.8)              |
| <b>GORD</b>           | 5,687 (14.2)              | 20,024 (16.3)             | 716 (16.5)                | 4,591 (19.6)              |
| <b>Lung cancer</b>    | 161 (0.4)                 | 1,155 (0.9)               | 43 (1.0)                  | 434 (1.9)                 |
| <b>BMI</b>            |                           |                           |                           |                           |
| Underweight           | 1,177 (2.9)               | 4,593 (3.7)               | 163 (3.8)                 | 5,379 (3.6)               |
| Normal                | 12,865 (32.2)             | 34,816 (28.3)             | 1,358 (31.3)              | 39,525 (26.6)             |
| Overweight            | 13,262 (33.2)             | 36,817 (29.9)             | 1,349 (31.1)              | 40,792 (27.4)             |
| Obese                 | 8,271 (20.7)              | 35,161 (28.5)             | 942 (21.7)                | 38,076 (25.6)             |
| Missing               | 4,411 (11.0)              | 11,851 (9.6)              | 523 (12.1)                | 24,872 (16.7)             |
| <b>Hypertension</b>   | 15,024 (37.6)             | 56,267 (45.7)             | 1,693 (39.1)              | 10,909 (46.5)             |
| <b>Diabetes</b>       | 4,702 (11.8)              | 19,389 (15.7)             | 592 (13.7)                | 4,329 (18.5)              |
| <b>Asthma</b>         | 14,569 (36.4)             | 49,264 (40.0)             | 1,548 (35.7)              | 10,843 (46.2)             |

Legend: MI (myocardial infarction), HF (heart failure), GORD (gastro-oesophageal reflux disorder). SD (standard deviation). Numbers are proportions or means displayed as n (%) or mean (SD). Total population N=191,038.

Table S5: Baseline characteristics by airflow limitation (FEV1 % predicted)

|                       | <b>≥80%</b>               | <b>50-79%</b>             | <b>30-49%</b>             | <b>&lt;30%</b>            |
|-----------------------|---------------------------|---------------------------|---------------------------|---------------------------|
| <b>Characteristic</b> | <b>n (%) or mean (SD)</b> |
| <b>Age</b>            |                           |                           |                           |                           |
| Mean (SD)             | 66.8 (11.7)               | 67.3 (11.1)               | 68.8 (10.6)               | 67.5 (10.4)               |
| <50                   | 6,415 (9.2)               | 9,939 (7.4)               | 2,243 (4.8)               | 472 (5.6)                 |
| 50-59                 | 13,125 (18.9)             | 24,626 (18.4)             | 7,184 (15.4)              | 1,431 (17.1)              |
| 60-69                 | 21,058 (30.3)             | 42,416 (31.7)             | 15,115 (32.5)             | 2,967 (35.4)              |
| 70-79                 | 19,329 (27.8)             | 38,809 (29.0)             | 14,868 (31.9)             | 2,544 (30.4)              |
| 80+                   | 9,549 (13.8)              | 17,834 (13.4)             | 7,146 (15.4)              | 968 (11.6)                |
| <b>Gender</b>         |                           |                           |                           |                           |
| Men                   | 32,469 (46.7)             | 72,877 (54.5)             | 28,475 (61.2)             | 5,725 (68.3)              |
| Women                 | 37,007 (53.3)             | 60,747 (45.5)             | 18,081 (38.8)             | 2,657 (31.7)              |
| <b>Smoking status</b> |                           |                           |                           |                           |
| Ex-smoker             | 38,668 (55.7)             | 69,869 (52.3)             | 24,549 (52.7)             | 4,495 (53.6)              |
| Current smoker        | 30,808 (44.3)             | 63,755 (47.7)             | 22,007 (47.3)             | 3,887 (46.4)              |
| <b>MI</b>             | 4,299 (6.2)               | 10,121 (7.6)              | 3,733 (8.0)               | 556 (6.6)                 |
| <b>HF</b>             | 3,470 (5.0)               | 8,873 (6.6)               | 3,659 (7.9)               | 636 (7.6)                 |
| <b>Stroke</b>         | 17,927 (25.8)             | 32,810 (24.6)             | 10,661 (22.9)             | 1,730 (20.7)              |
| <b>Depression</b>     | 20,501 (29.5)             | 35,453 (26.5)             | 10,414 (22.4)             | 1,885 (22.5)              |
| <b>Anxiety</b>        | 17,257 (24.8)             | 29,257 (21.9)             | 8,766 (18.8)              | 1,624 (19.4)              |
| <b>GORD</b>           | 13,483 (19.4)             | 21,510 (16.1)             | 5,728 (12.3)              | 844 (10.1)                |
| <b>Lung cancer</b>    | 412 (0.6)                 | 1,276 (1.0)               | 646 (1.4)                 | 98 (1.2)                  |
| <b>BMI</b>            |                           |                           |                           |                           |
| Underweight           | 1,514 (2.2)               | 3,848 (2.9)               | 2,885 (6.2)               | 975 (11.7)                |
| Normal                | 19,139 (27.6)             | 36,218 (27.1)             | 15,655 (33.6)             | 3,221 (38.4)              |
| Overweight            | 22,769 (32.8)             | 40,451 (30.3)             | 12,486 (26.8)             | 1,877 (22.4)              |
| Obese                 | 18,911 (27.2)             | 38,729 (29.0)             | 10,010 (21.5)             | 1,240 (14.8)              |
| Missing               | 7,143 (10.3)              | 14,378 (10.8)             | 5,520 (11.9)              | 1,069 (12.7)              |
| <b>Hypertension</b>   | 28,615 (41.2)             | 59,076 (44.2)             | 20,380 (43.8)             | 3,176 (37.9)              |
| <b>Diabetes</b>       | 9,247 (13.3)              | 21,286 (15.9)             | 6,988 (15.0)              | 1,015 (12.1)              |
| <b>Asthma</b>         | 24,105 (34.7)             | 47,618 (35.6)             | 17,821 (38.3)             | 3,547 (42.3)              |
| <b>AECOPD any</b>     |                           |                           |                           |                           |
| None                  | 49,386 (71.1)             | 90,819 (68.0)             | 29,369 (63.1)             | 4,889 (58.3)              |
| Any                   | 20,090 (28.9)             | 42,802 (32.0)             | 17,187 (36.9)             | 3,493 (41.7)              |

Legend: MI (myocardial infarction), HF (heart failure), GORD (gastro-oesophageal reflux disorder). SD (standard deviation). Numbers are proportions or means displayed as n (%) or mean (SD). Total population N=258,083.

Table S6: Risk of all-cause, COPD, and CVD related mortality by baseline exposure groups.

| Exposure group          | All-cause mortality  |            |                         |            | COPD-related mortality |            |                         |            | CVD-related mortality |            |                         |            |
|-------------------------|----------------------|------------|-------------------------|------------|------------------------|------------|-------------------------|------------|-----------------------|------------|-------------------------|------------|
|                         | Crude HR<br>(95% CI) | P<br>value | Adjusted HR<br>(95% CI) | P<br>value | Crude HR<br>(95% CI)   | P<br>value | Adjusted HR<br>(95% CI) | P<br>value | Crude HR<br>(95% CI)  | P<br>value | Adjusted HR<br>(95% CI) | P<br>value |
| <b>AECOPD any</b>       |                      |            |                         |            |                        |            |                         |            |                       |            |                         |            |
| None                    | Ref                  |            | Ref                     |            | Ref                    |            | Ref                     |            | Ref                   |            | Ref                     |            |
| Any                     | 1.36 (1.34-1.38)     | <0.001     | 1.18 (1.16-1.20)        | <0.001     | 1.75 (1.71-1.80)       | <0.001     | 1.42 (1.37-1.46)        | <0.001     | 1.15 (1.12-1.80)      | <0.001     | 1.00 (0.97-1.04)        | 0.765      |
| <b>AECOPD frequency</b> |                      |            |                         |            |                        |            |                         |            |                       |            |                         |            |
| None                    | Ref                  |            | Ref                     |            | Ref                    |            | Ref                     |            | Ref                   |            | Ref                     |            |
| <2                      | 1.23 (1.21-1.25)     | <0.001     | 1.11 (1.09-1.13)        | <0.001     | 1.49 (1.45-1.54)       | <0.001     | 1.28 (1.24-1.33)        | <0.001     | 1.09 (1.05-1.12)      | <0.001     | 0.97 (0.93-1.01)        | 0.187      |
| 2+                      | 1.60 (1.57-1.63)     | <0.001     | 1.32 (1.29-1.35)        | <0.001     | 2.23 (2.15-2.30)       | <0.001     | 1.64 (1.57-1.71)        | <0.001     | 1.25 (1.20-1.30)      | <0.001     | 1.06 (1.01-1.11)        | 0.019      |
| <b>AECOPD mod/sev</b>   |                      |            |                         |            |                        |            |                         |            |                       |            |                         |            |
| None                    | Ref                  |            | Ref                     |            | Ref                    |            | Ref                     |            | Ref                   |            | Ref                     |            |
| Moderate                | 1.22 (1.20-1.24)     | <0.001     | 1.11 (1.09-1.13)        | <0.001     | 1.51 (1.47-1.55)       | <0.001     | 1.31 (1.26-1.35)        | <0.001     | 1.07 (1.04-1.10)      | <0.001     | 0.98 (0.95-1.02)        | 0.329      |
| Severe                  | 2.70 (2.64-2.77)     | <0.001     | 1.81 (1.75-1.87)        | <0.001     | 3.65 (3.50-3.81)       | <0.001     | 2.17 (2.04-2.31)        | <0.001     | 1.74 (1.65-1.84)      | <0.001     | 1.16 (1.08-1.26)        | <0.001     |
| <b>COPD type</b>        |                      |            |                         |            |                        |            |                         |            |                       |            |                         |            |
| Chronic bronch          | Ref                  |            | Ref                     |            | Ref                    |            | Ref                     |            | Ref                   |            | Ref                     |            |
| Emphysema               | 1.09 (1.04-1.14)     | 0.001      | 1.17 (1.10-1.24)        | <0.001     | 1.21 (1.11-1.32)       | <0.001     | 1.24 (1.12-1.38)        | <0.001     | 0.85 (0.77-0.94)      | 0.002      | 0.94 (0.83-1.06)        | 0.305      |
| <b>GOLD ABCD</b>        |                      |            |                         |            |                        |            |                         |            |                       |            |                         |            |
| GOLD A                  | Ref                  |            | Ref                     |            | Ref                    |            | Ref                     |            | Ref                   |            | Ref                     |            |
| GOLD B                  | 1.96 (1.91-2.01)     | <0.001     | 1.65 (1.60-1.69)        | <0.001     | 3.00 (2.82-3.18)       | <0.001     | 2.63 (2.48-2.80)        | <0.001     | 1.73 (1.65-1.82)      | <0.001     | 1.34 (1.27-1.41)        | <0.001     |
| GOLD C                  | 1.41 (1.32-1.51)     | <0.001     | 1.30 (1.21-1.39)        | <0.001     | 2.05 (1.80-2.35)       | <0.001     | 1.75 (1.51-2.02)        | <0.001     | 1.36 (1.19-1.55)      | <0.001     | 1.31 (1.14-1.51)        | <0.001     |
| GOLD D                  | 3.08 (2.99-3.17)     | <0.001     | 2.43 (2.34-2.52)        | <0.001     | 6.20 (5.81-6.61)       | <0.001     | 4.57 (4.23-4.93)        | <0.001     | 2.07 (1.95-2.21)      | <0.001     | 1.53 (1.41-1.65)        | <0.001     |
| <b>GOLD FEV1% pred</b>  |                      |            |                         |            |                        |            |                         |            |                       |            |                         |            |
| GOLD 1                  | Ref                  |            | Ref                     |            | Ref                    |            | Ref                     |            | Ref                   |            | Ref                     |            |
| GOLD 2                  | 1.51 (1.58-1.54)     | <0.001     | 1.45 (1.42-1.48)        | <0.001     | 2.10 (1.99-2.12)       | <0.001     | 2.07 (1.96-2.19)        | <0.001     | 1.43 (1.38-1.49)      | <0.001     | 1.32 (1.27-1.38)        | <0.001     |
| GOLD 3                  | 2.64 (2.58-2.70)     | <0.001     | 2.33 (2.28-2.39)        | <0.001     | 6.15 (5.81-6.45)       | <0.001     | 5.30 (5.02-5.60)        | <0.001     | 1.89 (1.79-1.97)      | <0.001     | 1.61 (1.52-1.70)        | <0.001     |
| GOLD 4                  | 4.26 (4.12-4.40)     | <0.001     | 4.10 (3.95-4.25)        | <0.001     | 14.62 (13.76-15.53)    | <0.001     | 12.63 (11.82-13.51)     | <0.001     | 1.83 (1.69-1.99)      | <0.001     | 1.75 (1.60-1.91)        | <0.001     |

Legend: COPD (chronic obstructive pulmonary disease), CVD (cardiovascular disease), AECOPD (acute exacerbation of COPD), HR (hazard ratio). Adjusted models are adjusted for all baseline characteristics. N unadjusted for exposure GOLD FEV1% predicted=258,038, N adjusted for exposure GOLD FEV1% predicted=229,928. N unadjusted for exposure GOLD ABCD=191,003, N adjusted for exposure GOLD ABCD=172,114. N unadjusted for exposure COPD type=27,058, N adjusted for exposure COPD type=18,528. N unadjusted for all other exposures=339,647, N adjusted for all other exposures=229,928.



Figure E1: Proportion of patients dying from all-cause, COPD-related, and CVD-related causes within 30 days of an exacerbation of COPD by baseline FEV<sub>1</sub> predicted.

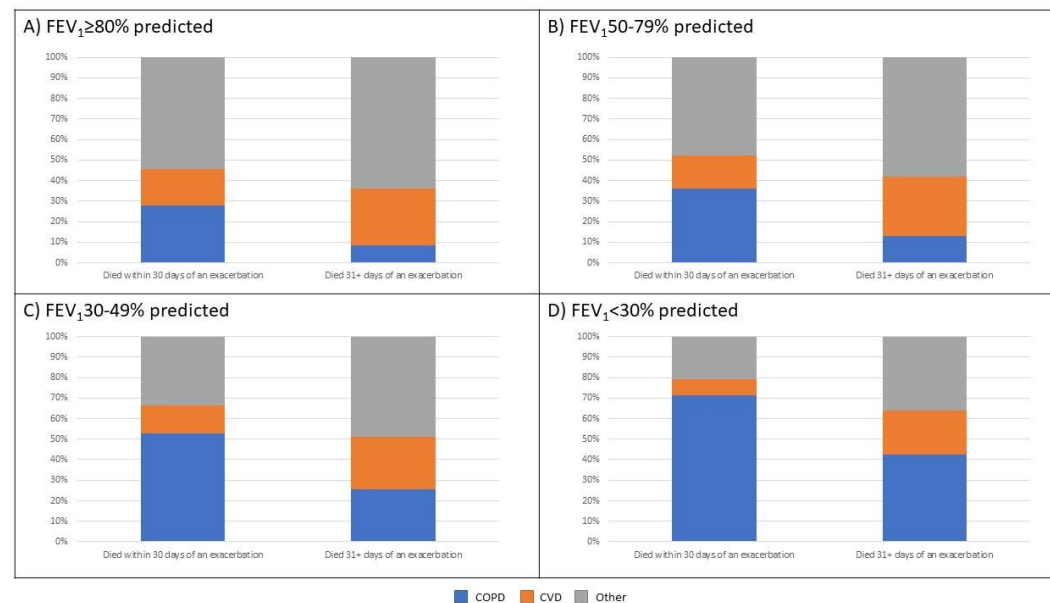

Legend: A) FEV<sub>1</sub> ≥80% predicted; B) FEV<sub>1</sub> 50-79% predicted; C) FEV<sub>1</sub> 30-49% predicted; D) FEV<sub>1</sub> <30% predicted. COPD (Chronic Obstructive Pulmonary Disease), CVD (cardiovascular disease). Of those with at least 1 exacerbation during follow-up.

## References

1. Wolf, A., et al., *Data resource profile: Clinical Practice Research Datalink (CPRD) Aurum*. International Journal of Epidemiology, 2019. **48**(6): p. 1740-1740g.
2. Selikoff, I.J. and H. Seidman, *Use of death certificates in epidemiological studies, including occupational hazards: variations in discordance of different asbestos-associated diseases on best evidence ascertainment*. (0271-3586 (Print)).
